# Supplementary material
Source: publisher figshare collection journal article supplement (https://diabetesjournals.figshare.com/ndownloader/files/28404273)

**Supplementary Materials**

**Figure S1. Change in the rate of vitamin B12 screening from February to June 2019 to the same months in 2020.**


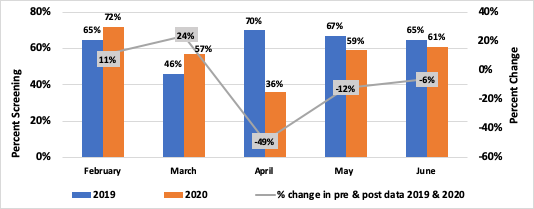


**Figure S2. Vitamin B12 orders in 2019 versus 2020.**


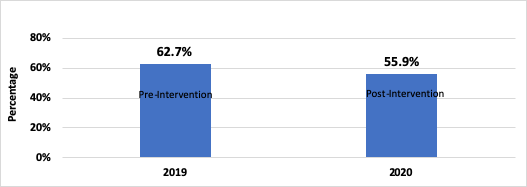

Supplement: Supplementary file 1 [file 28404273]
